# Supplementary material for: A Randomized Controlled Trial of a Literacy-Sensitive Self-Management Intervention for Chronic Obstructive Pulmonary Disease Patients
Source: Springer Nature journal article supplement (doi:10.1007/s11606-011-1867-6), 2011-09-20
Supplement: MOESM3 [file 11606_2011_1867_MOESM3_ESM.doc]

Figure 3. **Percentage of Subjects with Incorrect Inhaler Technique for each Item at baseline and follow-up for the Intervention and Usual Care groups**

Figure 3A: MDI. Percentage of participants demonstrating incorrect inhaler technique for each of the 8 MDI checklist steps.

Figure 3B: Diskus®. Percentage of participants demonstrating incorrect inhaler technique for each of the 8 Diskus® checklist steps.

Figure 3C: Handihaler®. Percentage of participants demonstrating incorrect inhaler technique for each of the 8 Handihaler® checklist steps.

1. **MDI**


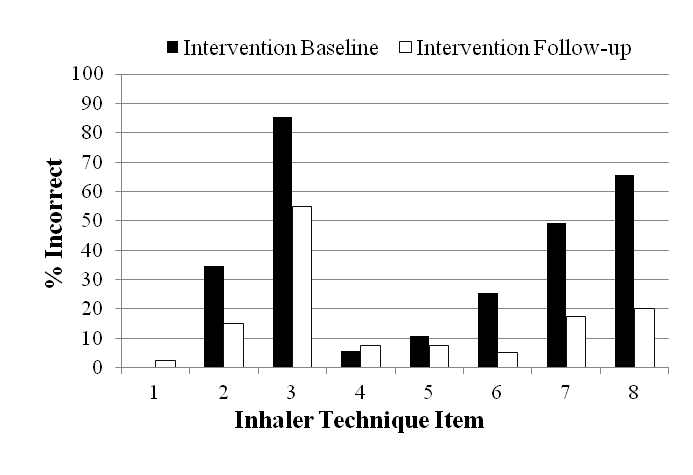

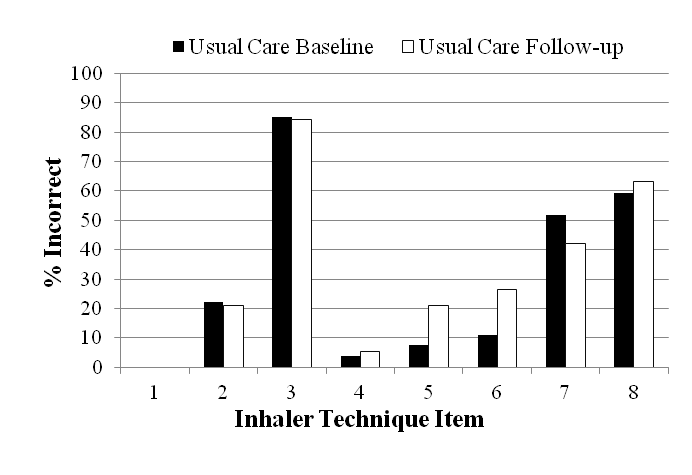

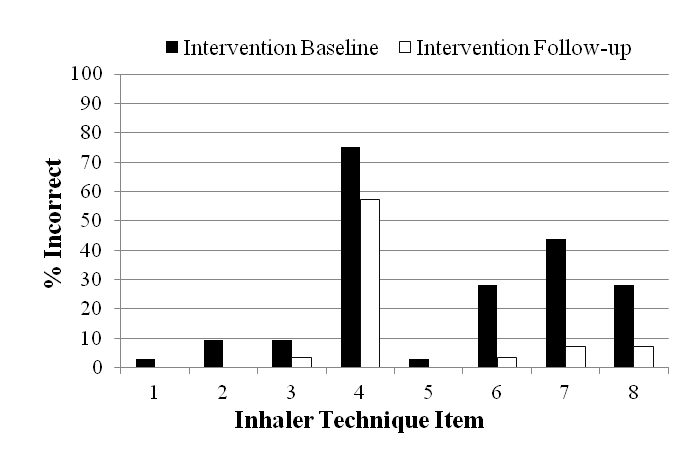

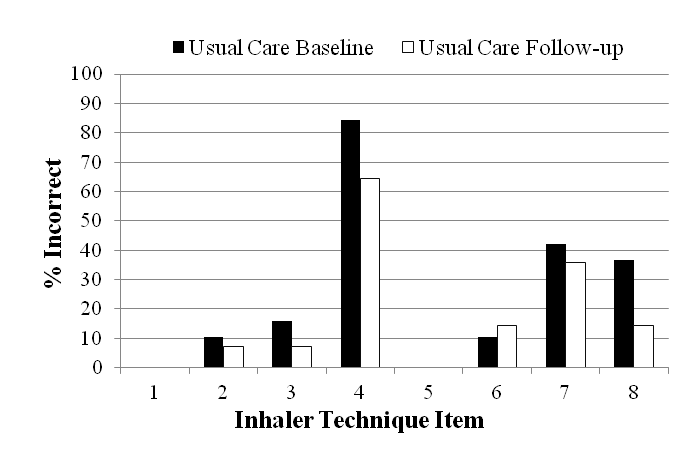

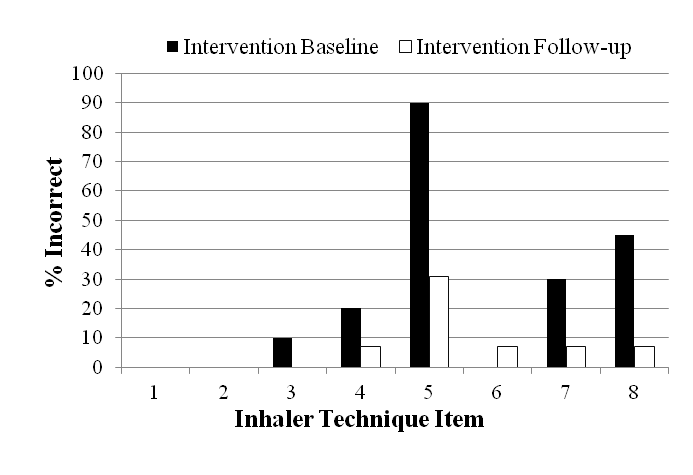

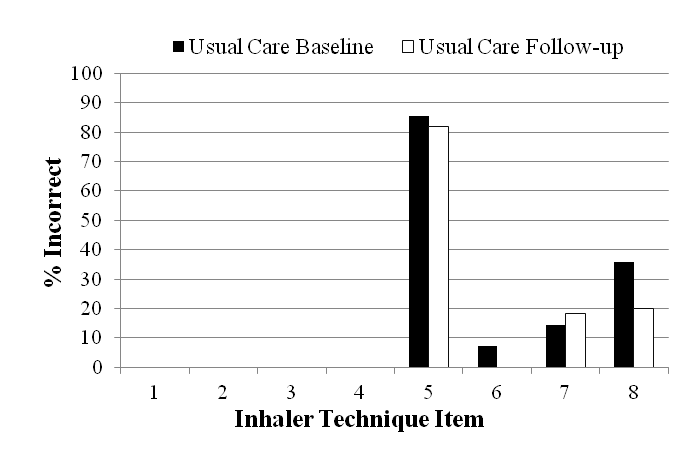


1. **Diskus®**
2. **Handihaler®**
